# Supplementary material for: Sustainable and shaped synthesis of MOF composites using PET waste for efficient phosphate removal
Source: Royal Society of Chemistry journal article supplement (doi:10.1039/d3nj05262a), 2023-12-20
Supplement: d3nj05262a1.pdf [file d3nj05262a1.pdf]

## Sustainable and Shaped Synthesis of MOF Composites Using PET Waste for Efficient Phosphate Removal

Elmehdi Moumen<sup>1</sup>, Khaireddin Boukayouht<sup>1</sup>, Soraia Elmoutchou, Said Kounbach, Samir El Hankari \*

Chemical and Biochemical Sciences, Green Process Engineering, Mohammed VI Polytechnic University (UM6P), Lot 660 - Hay Moulay Rachid, Ben Guerir 43150, Morocco

\*Corresponding author. E-mail address: [samir.elhankari@um6p.ma](mailto:samir.elhankari@um6p.ma) (S. El Hankari).

<sup>1</sup> These authors contributed equally to this work.

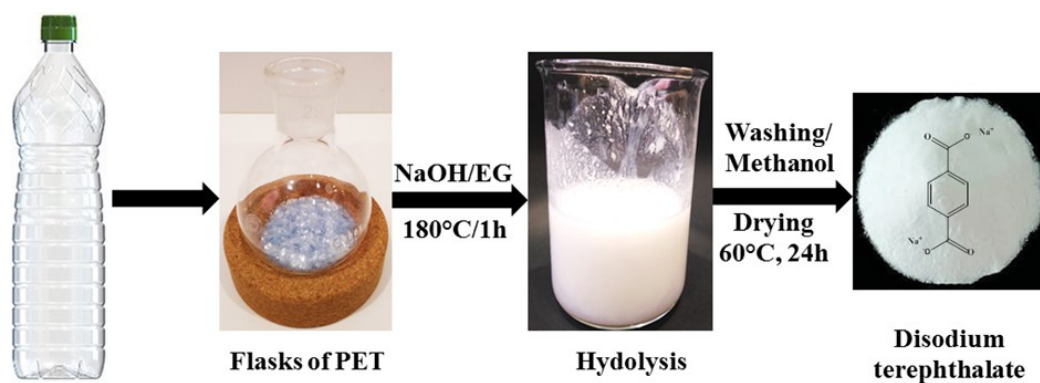

**Figure S1.** Schematic illustration of The PET conversion to DST.

### Equation of PET conversion and DST yield

$$\text{Eq S1: } \text{PET conversion} = \{(W_{\text{PET},0} - W_{\text{PET},f}) \div W_{\text{PET},0}\} \times 100$$

$$\text{Eq S2: } \text{DST yield} = \{W_{\text{DST}} \div (W_{\text{PET},0} - W_{\text{PET},f})\} \times 100$$

where  $W_{\text{PET},0}$  is the initial weight of PET (g);  $W_{\text{PET},f}$  is the residual weight of PET (g) ; and  $W_{\text{DST}}$  = weight of DST obtained by hydrolysis (g).

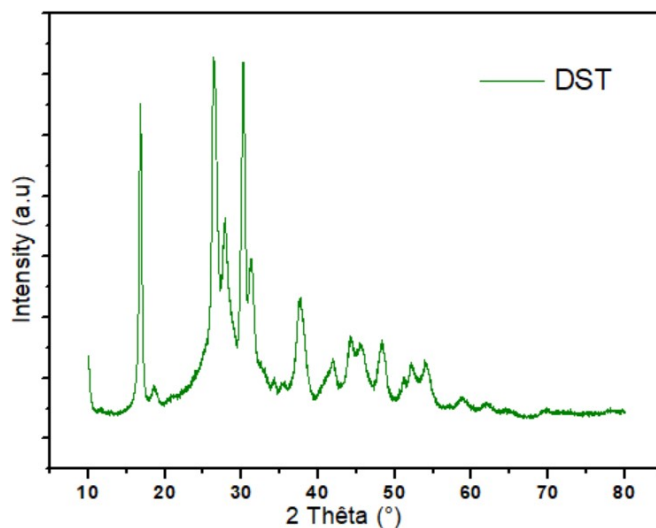

**Figure S2.** XRD Pattern of the synthesized DST.

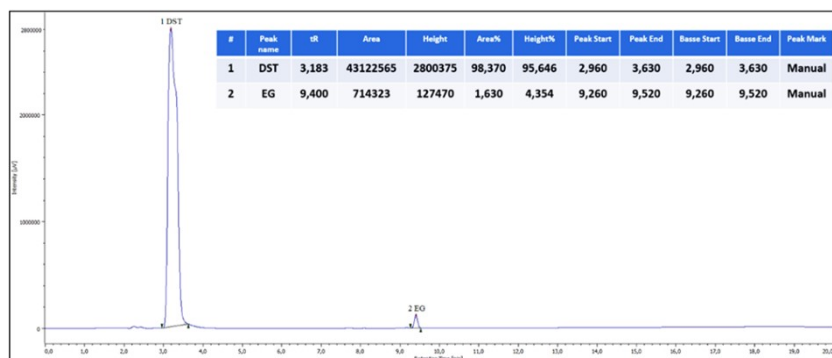

**Figure S3.** HPLC spectrum of the synthesized DST. Purity of DST was determined by UV-HPLC method with JASCO AS-4150, using the Luna C18 (150×60 mm, 3 μm) as the solid phase, water-acetonitrile (70:30) as the mobile phase. The detection wavelength was 254 nm and the flow rate was 1.5 mL/min.

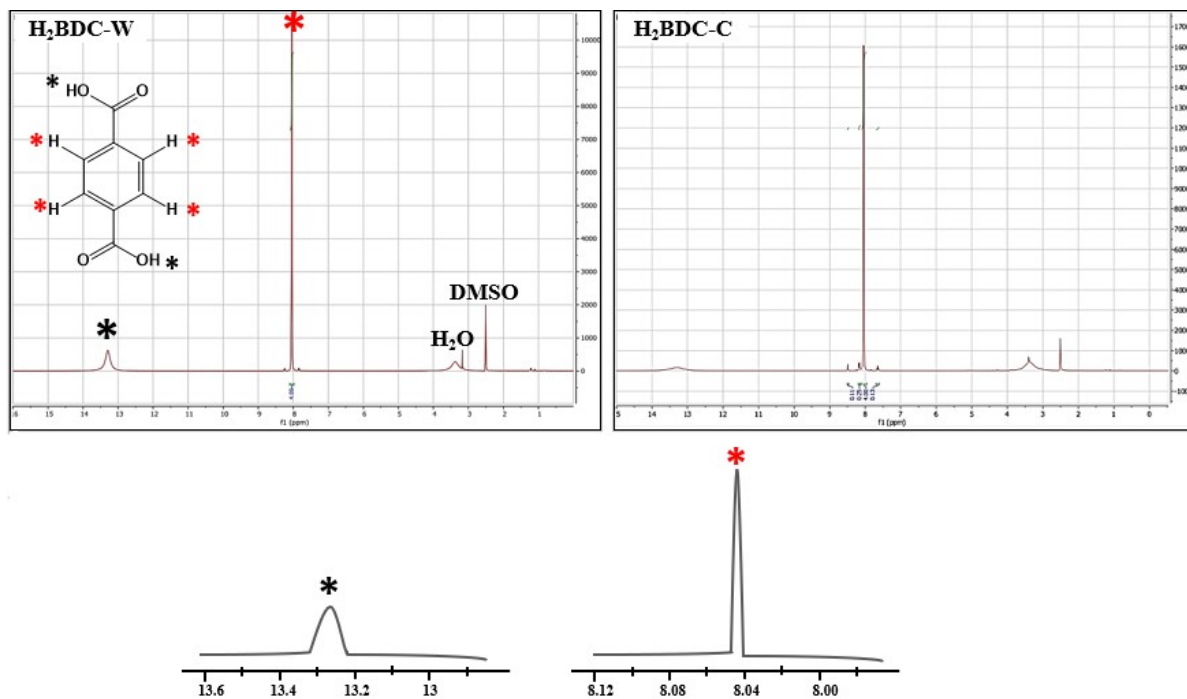

**Figure S4.**  $^1\text{H}$  NMR spectra of terephthalic acid prepared from waste ( $\text{H}_2\text{BDC-W}$ ) and compared to the commercial one ( $\text{H}_2\text{BDC-C}$ ).

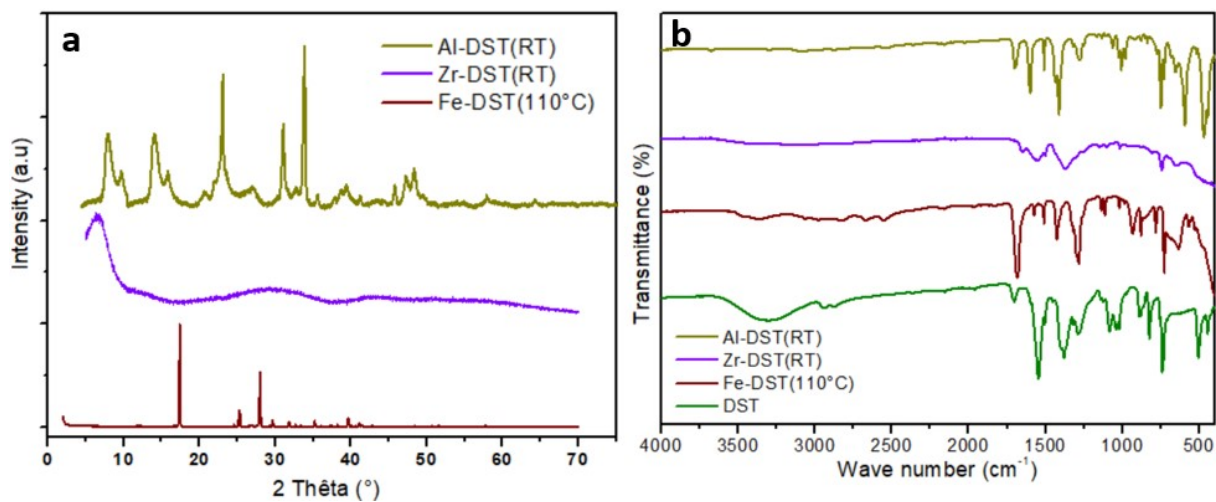

**Figure S5.** (a) the XRD pattern and (b) FTIR spectrum of Fe-DST (110 °C) Zr-DST (RT) and Al-DST (RT)

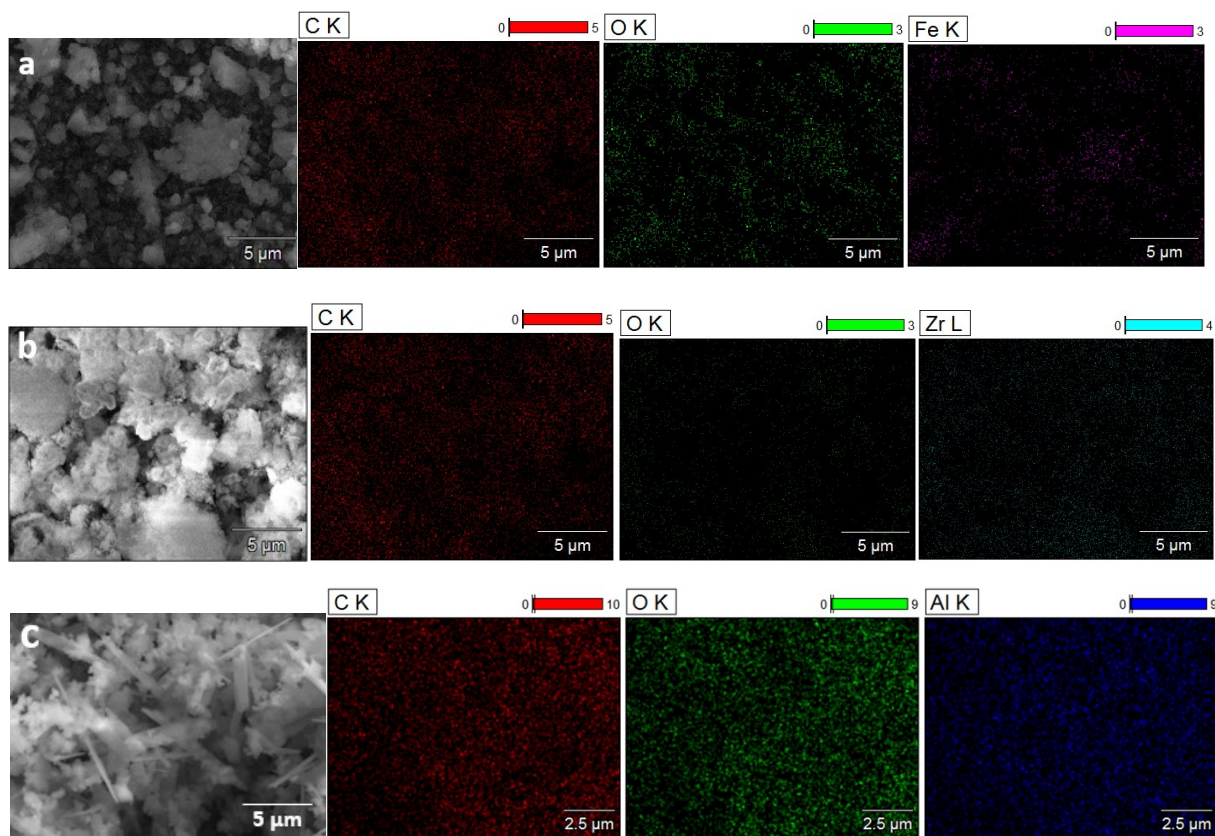

**Figure S6.** Figure 3: EDX mapping images of synthesized (a) Fe-DST (RT); (b) Zr-DST (120°C) and (c) Al-DST (220°C).

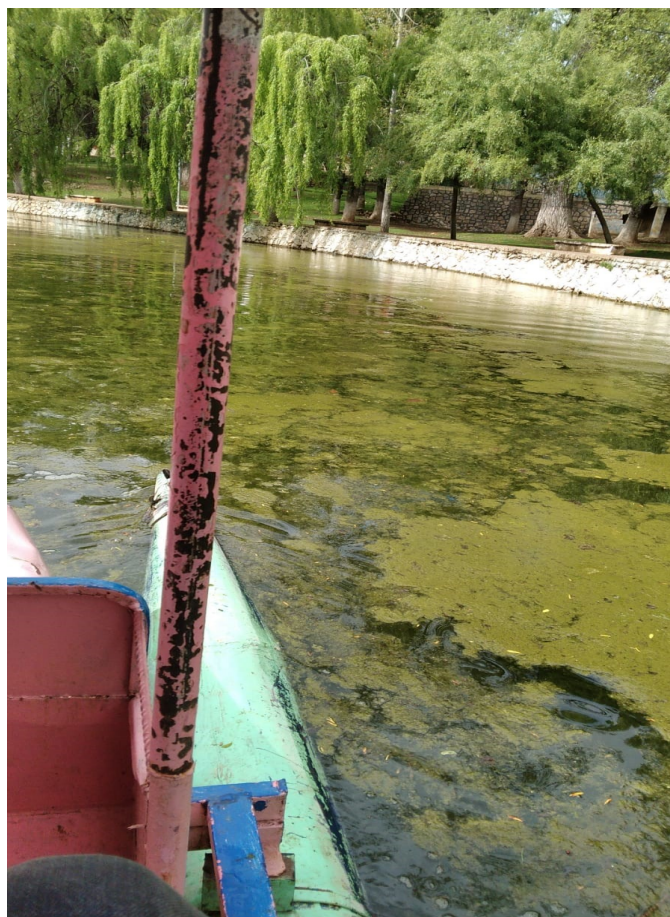

**Figure S7.** picture of the lake where the real water was taken (IFRAN, MOROCCO)

**Table S1:** Kinetic parameters of the pseudo-first order and pseudo-second models for PET-based MOFs

| Adsorbents    | Pseudo-first-order kinetic |                       |                | Pseudo-second-order kinetic |                |                |
|---------------|----------------------------|-----------------------|----------------|-----------------------------|----------------|----------------|
|               | qe(mg/g)                   | K <sub>1</sub> (mg/g) | R <sup>2</sup> | qe(mg/g)                    | K <sub>2</sub> | R <sup>2</sup> |
| Fe-DST(RT)    | 2.2174                     | 0.4186                | 0.8111         | 2.3863                      | 0.278          | 0.9733         |
| Zr-DST(120°C) | 2.2926                     | 0.34869               | 0.8218         | 2.34586                     | 0.497          | 0.9838         |

**Table S2:** Isotherm parameters of the Langmuir and Freundlich models for PET-based MOFs

| Adsorbents    | Langmuir model        |                       |                | Freundlich model      |        |                |
|---------------|-----------------------|-----------------------|----------------|-----------------------|--------|----------------|
|               | k <sub>L</sub> (L/mg) | q <sub>m</sub> (mg/g) | R <sup>2</sup> | K <sub>F</sub> (mg/g) | n      | R <sup>2</sup> |
| Fe-DST(RT)    | 0.3352                | 72.162                | 0.9502         | 21.3212               | 3.1546 | 0.8738         |
| Zr-DST(120°C) | 0.4611                | 66.6379               | 0.9829         | 19.6864               | 3.0479 | 0.9487         |
